# Supplementary material for: Isolation of MERS Coronavirus from a Dromedary Camel, Qatar, 2014
Source: PubMed Central journal article supplement (PMC4111206; doi:10.3201/eid2008.140663), 2014-08
Supplement: 14-0663-Techapp-s1.pdf [file 14-0663-Techapp-s1.pdf]

# Isolation of MERS Coronavirus from a Dromedary Camel, Qatar, 2014

## Technical Appendix

Appendix Table. Variable amino acids in the Middle East respiratory syndrome coronavirus spike protein in different isolates

|                         | 23 | 26 | 51 | 94 | 125 | 158 | 194 | 201            | 301 | 431 | 434 | 460 | 482 | 506            | 509 | 534 | 666 | 696 | 756 | 886 | 888 | 914 | 918 | 1020 | 1083 | 1158 | 1193 | 1208 | 1227 | 1333 | 1346 |
|-------------------------|----|----|----|----|-----|-----|-----|----------------|-----|-----|-----|-----|-----|----------------|-----|-----|-----|-----|-----|-----|-----|-----|-----|------|------|------|------|------|------|------|------|
| EMC_2012                | P  | V  | S  | G  | N   | D   | H   | Y              | R   | A   | I   | A   | A   | L              | D   | W   | E   | M   | E   | A   | S   | Q   | A   | Q    | A    | A    | A    | Q    | T    | C    | E    |
| Qatar_Camel_2_2014      | P  | V  | S  | G  | N   | D   | H   | H <sup>a</sup> | R   | A   | I   | A   | A   | L              | D   | W   | E   | M   | E   | A   | S   | Q   | A   | R    | A    | A    | A    | Q    | T    | C    | E    |
| Al-Hasa_1_2013          | P  | V  | S  | G  | N   | D   | H   | Y              | R   | A   | I   | A   | A   | L              | D   | W   | E   | M   | E   | A   | S   | Q   | A   | R    | A    | A    | A    | H    | T    | C    | E    |
| Al-Hasa_17_2013         | P  | V  | S  | G  | N   | D   | H   | Y              | R   | A   | I   | A   | A   | L              | D   | W   | E   | M   | E   | A   | S   | Q   | A   | R    | A    | A    | A    | H    | T    | C    | E    |
| Al-Hasa_18_2013         | P  | V  | S  | G  | N   | D   | H   | Y              | R   | A   | I   | A   | A   | L              | D   | W   | E   | M   | E   | A   | S   | Q   | A   | R    | A    | A    | A    | H    | T    | C    | E    |
| Al-Hasa_21_2013         | P  | V  | S  | G  | N   | D   | H   | Y              | R   | A   | I   | A   | A   | L              | D   | W   | E   | M   | E   | A   | S   | Q   | A   | R    | S    | A    | A    | H    | T    | C    | E    |
| Al-Hasa_25_2013         | P  | V  | S  | G  | N   | D   | H   | Y              | R   | A   | I   | A   | A   | L              | D   | W   | E   | M   | E   | A   | S   | Q   | A   | R    | A    | A    | A    | H    | T    | C    | E    |
| Bisha_1_2012            | P  | V  | S  | G  | N   | D   | H   | Y              | R   | A   | I   | A   | A   | L              | G   | W   | E   | M   | E   | A   | S   | Q   | A   | R    | A    | A    | A    | Q    | T    | C    | E    |
| Buraidah_1_2013         | P  | V  | S  | G  | N   | D   | H   | Y              | R   | A   | I   | A   | A   | L              | D   | W   | E   | M   | E   | A   | S   | Q   | A   | R    | A    | A    | A    | Q    | I    | C    | E    |
| Egypt_Camel_HKU205_2014 | L  | A  | S  | G  | N   | D   | Y   | Y              | R   | A   | S   | A   | A   | L              | D   | W   | K   | T   | Q   | S   | I   | Q   | S   | Q    | A    | S    | A    | Q    | T    | R    | E    |
| England/Qatar_1_2012    | P  | V  | S  | G  | N   | D   | H   | Y              | R   | A   | I   | A   | A   | F <sup>b</sup> | D   | W   | E   | M   | E   | A   | S   | Q   | A   | H    | A    | A    | A    | Q    | T    | C    | E    |
| England_2_2013          | P  | V  | S  | G  | N   | D   | H   | Y              | R   | A   | I   | A   | A   | L              | D   | W   | E   | M   | E   | A   | S   | Q   | A   | R    | A    | A    | A    | Q    | T    | C    | E    |
| FRA/UAE_2013            | P  | V  | S  | G  | Y   | D   | H   | Y              | R   | A   | I   | A   | A   | L              | D   | W   | E   | M   | E   | A   | S   | H   | A   | R    | A    | A    | S    | Q    | T    | C    | E    |
| Hafr-Al-Batin_1_2013    | P  | V  | S  | G  | N   | Y   | H   | Y              | R   | A   | I   | A   | A   | L              | D   | W   | E   | M   | E   | A   | S   | Q   | A   | R    | A    | A    | A    | Q    | T    | C    | E    |
| Hafr-Al-Batin_2_2013    | P  | V  | S  | G  | N   | Y   | H   | Y              | R   | A   | I   | A   | A   | L              | D   | W   | E   | M   | E   | A   | S   | Q   | A   | R    | A    | A    | A    | Q    | T    | C    | E    |
| Hafr-Al-Batin_6_2013    | P  | V  | S  | G  | N   | Y   | H   | Y              | R   | A   | I   | A   | A   | L              | D   | W   | E   | M   | E   | A   | S   | Q   | A   | R    | A    | A    | A    | Q    | T    | C    | E    |
| Jordan-N3/2012          | P  | V  | S  | V  | N   | D   | Y   | Y              | L   | A   | I   | A   | A   | L              | D   | W   | E   | M   | E   | A   | S   | Q   | A   | Q    | A    | S    | A    | Q    | T    | C    | E    |
| Munich/AbuDhabi/2013    | P  | I  | S  | G  | N   | D   | H   | Y              | R   | A   | I   | A   | A   | L              | D   | W   | E   | M   | E   | A   | S   | Q   | A   | H    | A    | A    | A    | Q    | T    | C    | E    |
| Qatar3_2013             | P  | V  | S  | G  | N   | D   | H   | Y              | R   | A   | I   | F   | A   | L              | D   | W   | E   | M   | E   | A   | S   | Q   | A   | R    | A    | A    | A    | Q    | T    | C    | E    |
| Qatar4_2013             | P  | V  | S  | G  | N   | D   | H   | Y              | R   | A   | I   | F   | A   | L              | D   | W   | E   | M   | E   | A   | S   | Q   | A   | R    | A    | A    | A    | Q    | T    | C    | E    |
| Riyadh_1_2012           | P  | V  | S  | G  | N   | D   | H   | Y              | R   | A   | I   | A   | A   | L              | G   | W   | E   | M   | E   | A   | S   | Q   | A   | R    | A    | A    | A    | Q    | T    | C    | E    |
| Riyadh_14_2013          | P  | V  | S  | G  | N   | D   | H   | Y              | R   | A   | I   | A   | A   | L              | D   | W   | E   | M   | E   | A   | S   | Q   | A   | R    | A    | A    | A    | Q    | T    | C    | E    |
| Riyadh_2_2012           | P  | V  | S  | G  | N   | D   | H   | Y              | R   | A   | I   | A   | A   | L              | D   | A   | E   | M   | E   | A   | S   | Q   | A   | R    | A    | A    | A    | Q    | T    | C    | E    |
| Riyadh_3_2013           | P  | V  | S  | G  | N   | D   | H   | Y              | R   | A   | I   | A   | A   | L              | D   | W   | E   | M   | E   | A   | S   | Q   | A   | H    | A    | A    | A    | Q    | T    | C    | E    |
| Riyadh_4_2013           | P  | V  | S  | G  | N   | D   | H   | Y              | R   | A   | I   | A   | A   | L              | D   | W   | E   | M   | E   | A   | S   | Q   | A   | H    | A    | A    | A    | Q    | T    | C    | E    |
| Riyadh_5_2013           | P  | V  | F  | G  | N   | D   | H   | Y              | R   | A   | I   | A   | A   | L              | D   | W   | E   | M   | E   | A   | S   | Q   | A   | H    | A    | A    | A    | Q    | T    | C    | E    |
| Riyadh_9_2013           | P  | V  | S  | G  | N   | D   | H   | Y              | R   | P   | I   | A   | V   | L              | D   | W   | E   | M   | E   | A   | S   | Q   | A   | R    | A    | A    | A    | Q    | T    | C    | E    |
| Taif_1_2013             | P  | V  | S  | G  | N   | D   | H   | Y              | R   | A   | I   | A   | A   | L              | D   | W   | E   | M   | E   | A   | S   | Q   | A   | H    | A    | A    | A    | Q    | T    | C    | E    |
| Wadi-Ad-Dawasir_1_2013  | P  | V  | S  | G  | N   | D   | H   | Y              | R   | A   | I   | A   | A   | L              | D   | W   | E   | M   | E   | A   | S   | Q   | A   | H    | A    | A    | A    | Q    | T    | C    | Q    |
| Consensus               | P  | V  | S  | G  | N   | D   | H   | Y              | R   | A   | I   | A   | A   | L              | D   | W   | E   | M   | E   | A   | S   | Q   | A   | R    | A    | A    | A    | Q    | T    | C    | E    |

<sup>a</sup>Amino acid residues in the Middle East respiratory syndrome (MERS-CoV) spike protein that differ from the EMC/2012 isolate are displayed in red.

<sup>b</sup>Critical amino acid in binding to DPP4 receptor, displayed in green.

**A**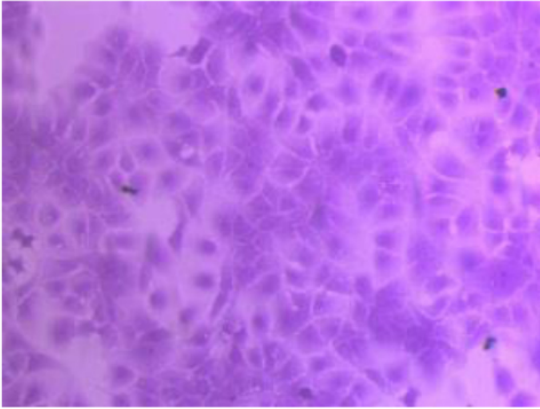**B**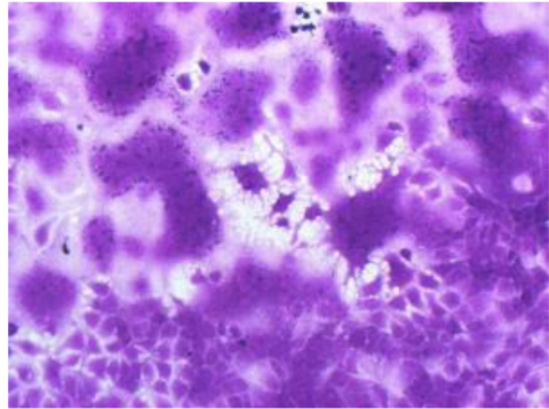

Appendix Figure. Middle East respiratory syndrome coronavirus (MERS-CoV) from camel replicates in human hepatoma (Huh-7) cells. Mock-inoculated cells (A) or cells inoculated with camel MERS-CoV (B) were fixed 40 hours after inoculation and stained with crystal violet.
